# Supplementary material for: Crystal growth and negative thermal expansion properties of a Y2Mo4O15 single crystal
Source: Royal Society of Chemistry journal article supplement (doi:10.1039/d3ra01320k), 2023-01-01

## checkCIF/PLATON report

Structure factors have been supplied for datablock(s) 200721b

THIS REPORT IS FOR GUIDANCE ONLY. IF USED AS PART OF A REVIEW PROCEDURE FOR PUBLICATION, IT SHOULD NOT REPLACE THE EXPERTISE OF AN EXPERIENCED CRYSTALLOGRAPHIC REFEREE.

No syntax errors found.      CIF dictionary      Interpreting this report

### Datablock: 200721b

---

Bond precision:    Y- O = 0.0071 A                      Wavelength=0.71073

Cell:                      a=6.8176 (5)              b=9.5857 (6)              c=10.5127 (8)  
                              alpha=90              beta=105.512 (8)              gamma=90

Temperature:            323 K

|                        | Calculated | Reported     |
|------------------------|------------|--------------|
| Volume                 | 662.00 (9) | 662.00 (8)   |
| Space group            | P 21/c     | P 1 21/c 1   |
| Hall group             | -P 2ybc    | -P 2ybc      |
| Moiety formula         | Mo4 O15 Y2 | Mo4 O15 Y2   |
| Sum formula            | Mo4 O15 Y2 | Mo4 O15 Y2   |
| Mr                     | 801.58     | 801.58       |
| Dx, g cm <sup>-3</sup> | 4.021      | 4.021        |
| Z                      | 2          | 2            |
| Mu (mm <sup>-1</sup> ) | 12.413     | 12.413       |
| F000                   | 732.0      | 732.0        |
| F000'                  | 707.48     |              |
| h, k, lmax             | 8, 11, 13  | 8, 11, 13    |
| Nref                   | 1353       | 1349         |
| Tmin, Tmax             |            | 0.129, 1.000 |
| Tmin'                  |            |              |

Correction method= # Reported T Limits: Tmin=0.129 Tmax=1.000  
AbsCorr = MULTI-SCAN

Data completeness= 0.997

Theta (max)= 26.372

R(reflections)= 0.0495 ( 1210)

wR2(reflections)=  
0.1229 ( 1349)

S = 0.891

Npar= 98

---

The following ALERTS were generated. Each ALERT has the format  
**test-name\_ALERT\_alert-type\_alert-level.**  
Click on the hyperlinks for more details of the test.

---

 **Alert level A**

EXPT005\_ALERT\_1\_A \_exptl\_crystal\_description is missing  
Crystal habit description.  
The following tests will not be performed.  
CRYSR\_01

PLAT699\_ALERT\_1\_A Missing \_exptl\_crystal\_description Value ..... Please Do !

---

 **Alert level B**

PLAT196\_ALERT\_1\_B No TEMP record and \_measurement\_temperature .NE. 293 Degree

---

 **Alert level C**

PLAT053\_ALERT\_1\_C Minimum Crystal Dimension Missing (or Error) ... Please Check  
PLAT054\_ALERT\_1\_C Medium Crystal Dimension Missing (or Error) ... Please Check  
PLAT055\_ALERT\_1\_C Maximum Crystal Dimension Missing (or Error) ... Please Check  
PLAT213\_ALERT\_2\_C Atom O5 has ADP max/min Ratio ..... 3.2 prolat  
PLAT911\_ALERT\_3\_C Missing FCF Refl Between Thmin & STh/L= 0.600 3 Report  
PLAT971\_ALERT\_2\_C Check Calcd Resid. Dens. 1.02Ang From Y1 1.87 eA-3  
PLAT971\_ALERT\_2\_C Check Calcd Resid. Dens. 1.07Ang From O4 1.56 eA-3  
PLAT971\_ALERT\_2\_C Check Calcd Resid. Dens. 1.16Ang From O3 1.53 eA-3  
PLAT972\_ALERT\_2\_C Check Calcd Resid. Dens. 0.65Ang From O5 -1.71 eA-3  
PLAT972\_ALERT\_2\_C Check Calcd Resid. Dens. 0.78Ang From Mo1 -1.61 eA-3  
PLAT972\_ALERT\_2\_C Check Calcd Resid. Dens. 0.70Ang From Mo1 -1.61 eA-3  
PLAT972\_ALERT\_2\_C Check Calcd Resid. Dens. 0.70Ang From Mo1 -1.60 eA-3  
PLAT972\_ALERT\_2\_C Check Calcd Resid. Dens. 1.10Ang From Y1 -1.59 eA-3  
PLAT972\_ALERT\_2\_C Check Calcd Resid. Dens. 1.36Ang From O3 -1.54 eA-3  
PLAT972\_ALERT\_2\_C Check Calcd Resid. Dens. 0.62Ang From Mo2 -1.51 eA-3  
PLAT975\_ALERT\_2\_C Check Calcd Resid. Dens. 0.98Ang From O4 . 1.04 eA-3  
PLAT976\_ALERT\_2\_C Check Calcd Resid. Dens. 1.10Ang From O4 . -1.23 eA-3

---

 **Alert level G**

PLAT003\_ALERT\_2\_G Number of Uiso or Uij Restrained non-H Atoms ... 1 Report  
PLAT004\_ALERT\_5\_G Polymeric Structure Found with Maximum Dimension 3 Info  
PLAT083\_ALERT\_2\_G SHELXL Second Parameter in WGHT Unusually Large 8.09 Why ?  
PLAT186\_ALERT\_4\_G The CIF-Embedded .res File Contains ISOR Records 1 Report  
PLAT794\_ALERT\_5\_G Tentative Bond Valency for Mo1 (VI) . 6.00 Info  
PLAT794\_ALERT\_5\_G Tentative Bond Valency for Mo2 (VI) . 5.87 Info  
PLAT794\_ALERT\_5\_G Tentative Bond Valency for Y1 (III) . 3.31 Info  
PLAT860\_ALERT\_3\_G Number of Least-Squares Restraints ..... 6 Note  
PLAT912\_ALERT\_4\_G Missing # of FCF Reflections Above STh/L= 0.600 1 Note  
PLAT913\_ALERT\_3\_G Missing # of Very Strong Reflections in FCF .... 1 Note  
PLAT941\_ALERT\_3\_G Average HKL Measurement Multiplicity ..... 3.6 Low

---

- 2 **ALERT level A** = Most likely a serious problem - resolve or explain  
1 **ALERT level B** = A potentially serious problem, consider carefully  
17 **ALERT level C** = Check. Ensure it is not caused by an omission or oversight  
11 **ALERT level G** = General information/check it is not something unexpected

```
6 ALERT type 1 CIF construction/syntax error, inconsistent or missing data
15 ALERT type 2 Indicator that the structure model may be wrong or deficient
4 ALERT type 3 Indicator that the structure quality may be low
2 ALERT type 4 Improvement, methodology, query or suggestion
4 ALERT type 5 Informative message, check
```

---

It is advisable to attempt to resolve as many as possible of the alerts in all categories. Often the minor alerts point to easily fixed oversights, errors and omissions in your CIF or refinement strategy, so attention to these fine details can be worthwhile. In order to resolve some of the more serious problems it may be necessary to carry out additional measurements or structure refinements. However, the purpose of your study may justify the reported deviations and the more serious of these should normally be commented upon in the discussion or experimental section of a paper or in the "special\_details" fields of the CIF. checkCIF was carefully designed to identify outliers and unusual parameters, but every test has its limitations and alerts that are not important in a particular case may appear. Conversely, the absence of alerts does not guarantee there are no aspects of the results needing attention. It is up to the individual to critically assess their own results and, if necessary, seek expert advice.

### **Publication of your CIF in IUCr journals**

A basic structural check has been run on your CIF. These basic checks will be run on all CIFs submitted for publication in IUCr journals (*Acta Crystallographica*, *Journal of Applied Crystallography*, *Journal of Synchrotron Radiation*); however, if you intend to submit to *Acta Crystallographica Section C* or *E* or *IUCrData*, you should make sure that full publication checks are run on the final version of your CIF prior to submission.

### **Publication of your CIF in other journals**

Please refer to the *Notes for Authors* of the relevant journal for any special instructions relating to CIF submission.

### **Validation response form**

Please find below a validation response form (VRF) that can be filled in and pasted into your CIF.

```
# start Validation Reply Form
_vrf_EXPT005_200721b
;
PROBLEM: _exptl_crystal_description is missing
RESPONSE: ...
;
_vrf_PLAT699_200721b
;
PROBLEM: Missing _exptl_crystal_description Value ..... Please Do !
RESPONSE: ...
;
# end Validation Reply Form
```

---

PLATON version of 28/11/2022; check.def file version of 28/11/2022

Datablock 200721b - ellipsoid plot

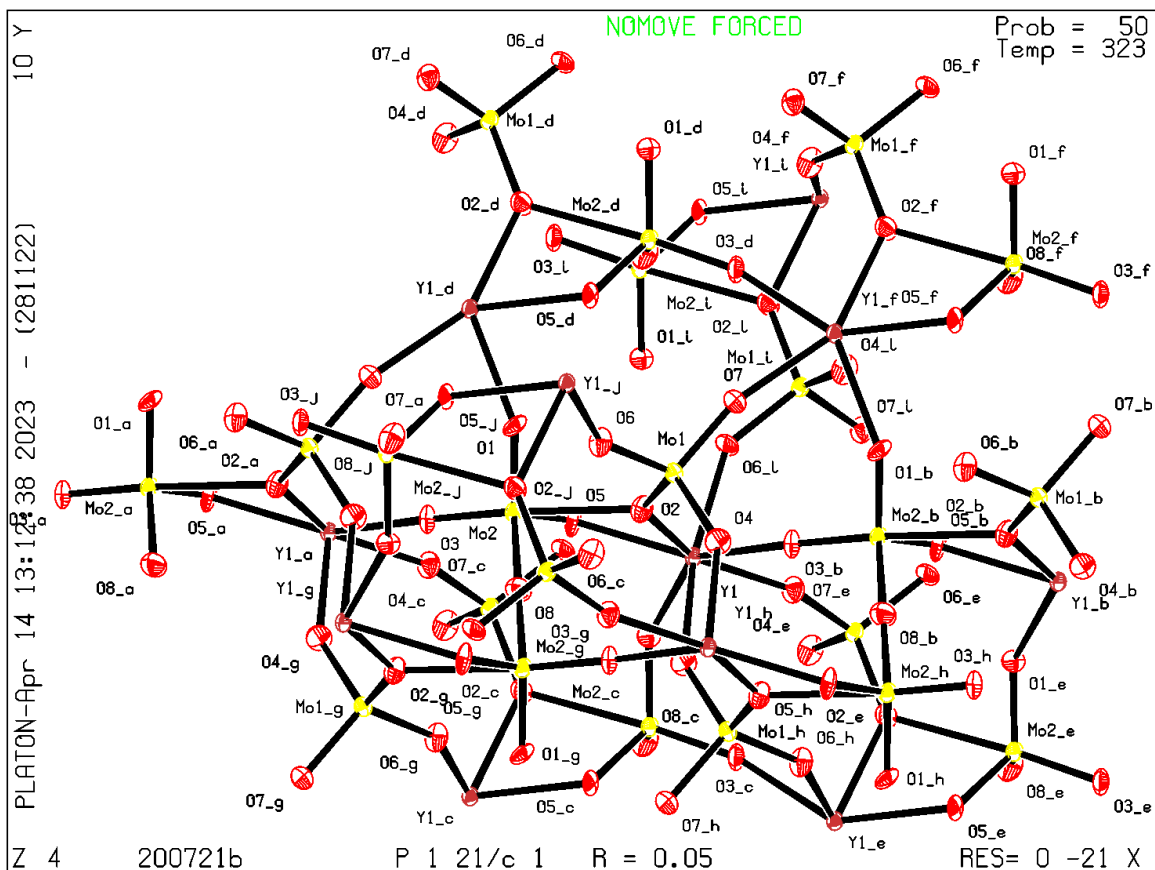

Supplement: d3ra01320k6.pdf [file d3ra01320k6.pdf]
