# Supplementary material for: Crystal growth and negative thermal expansion properties of a Y2Mo4O15 single crystal
Source: Royal Society of Chemistry journal article supplement (doi:10.1039/d3ra01320k), 2023-01-01
Supplement: d3ra01320k9.pdf [file d3ra01320k9.pdf]

Table S1 to Table S16 respectively list the crystal data and cell parameters at four temperatures. Mo and O atoms at each temperature are named independently (the same Mo and O atoms have been renamed in the manuscript).

**Table S1.** Crystal Data and Structure Refinement for  $Y_2Mo_4O_{15}$  (293K)

| Empirical formula           | $LiY(MoO_4)_2$                     |      |
|-----------------------------|------------------------------------|------|
| Formula weight              | 801.58 g/mol                       |      |
| Temperature                 | 292.99(1) K                        |      |
| Wavelength                  | 0.71073                            |      |
| Crystal system              | Monoclinic                         |      |
| Space group                 | $P2_1/c$                           |      |
| Sum formula                 | $Y_2Mo_4O_{15}$                    |      |
| Cell                        | $a = 6.8110$ (4) Å                 |      |
|                             | $b = 9.5833$ (6) Å                 |      |
|                             | $c = 10.5124$ (8) Å                |      |
|                             | alpha = 90                         |      |
|                             | beta = 105.512 (7)                 |      |
| Volume                      | gamma = 90                         |      |
|                             | 661.17 (8) Å <sup>3</sup>          |      |
| Z                           | 2                                  |      |
| Density (calculated)        | 4.02612 g/cm <sup>3</sup>          |      |
| μ coefficient               | 15.636                             | 15.0 |
| Nref                        | 1351                               |      |
| Tmin, Tmax                  | 0.556, 0.780                       |      |
| F(000)                      | 732.0                              |      |
| Crystal size                | 0.12 × 0.09 × 0.07 mm <sup>3</sup> |      |
| Theat (max)                 | 26.372                             |      |
| Index ranges                | -9 ≤ h ≤ 9                         |      |
|                             | -12 ≤ k ≤ 13                       |      |
|                             | -13 ≤ l ≤ 14                       |      |
| R (reflections)             | 0.0531 (1217)                      |      |
| wR2 (reflections)           | 0.1306 (1342)                      |      |
| Data completeness           | 0.993                              |      |
| Largest diff. peak and hole | 2.19 and -2.12 e Å <sup>-3</sup>   |      |

**Table S2.** Selected bond angles (deg.) in Y<sub>2</sub>Mo<sub>4</sub>O<sub>15</sub> (293 K)

| Atom1 | Atom2 | Atom3 | Angle 2, 1, 3 |
|-------|-------|-------|---------------|
| Mo1   | O3    | O8    | 109.985(315)  |
| Mo1   | O3    | O7    | 109.076(303)  |
| Mo1   | O3    | O2    | 110.583(321)  |
| Mo1   | O8    | O7    | 107.683(323)  |
| Mo1   | O8    | O2    | 109.055(303)  |
| Mo1   | O7    | O2    | 110.412(306)  |
| Mo2   | O4    | O6    | 105.052(333)  |
| Mo2   | O4    | O5    | 114.019(325)  |
| Mo2   | O4    | O1    | 113.098(239)  |
| Mo2   | O6    | O5    | 103.896(336)  |
| Mo2   | O6    | O1    | 103.465(236)  |
| Mo2   | O5    | O1    | 115.590(233)  |
| Y1    | O8    | O7    | 163.077(234)  |
| Y1    | O8    | O3    | 82.356(235)   |
| Y1    | O8    | O5    | 118.090(245)  |
| Y1    | O8    | O2    | 90.103(231)   |
| Y1    | O8    | O4    | 87.144(246)   |
| Y1    | O8    | O6    | 83.232(243)   |
| Y1    | O7    | O3    | 96.127(237)   |
| Y1    | O7    | O5    | 77.486(245)   |
| Y1    | O7    | O2    | 82.997(225)   |
| Y1    | O7    | O4    | 104.355(256)  |
| Y1    | O7    | O6    | 80.109(249)   |
| Y1    | O3    | O5    | 76.019(249)   |
| Y1    | O3    | O2    | 150.631(238)  |
| Y1    | O3    | O4    | 139.260(258)  |
| Y1    | O3    | O6    | 75.050(257)   |
| Y1    | O5    | O2    | 131.551(239)  |
| Y1    | O5    | O4    | 74.647(257)   |
| Y1    | O5    | O6    | 140.94(25)    |
| Y1    | O2    | O4    | 67.962(252)   |
| Y1    | O2    | O6    | 75.894(241)   |
| Y1    | O4    | O6    | 142.516(247)  |

|    |     |     |              |
|----|-----|-----|--------------|
| O1 | Mo1 | Mo2 | 180.000      |
| O2 | Mo2 | Y1  | 135.613(339) |
| O3 | Mo1 | Y1  | 164.748(395) |
| O4 | Mo1 | Y1  | 119.675(353) |
| O5 | Mo2 | Y1  | 143.557(374) |
| O6 | Mo2 | Y1  | 163.482(402) |
| O7 | Mo2 | Y1  | 147.785(359) |
| O8 | Mo1 | Y1  | 144.926(363) |

**Table S3.** Selected bond lengths (Å) in LiY(MoO<sub>4</sub>)<sub>2</sub> (293K)

| Atom 1 | Atom 1 | d 1,2 (Å)  |
|--------|--------|------------|
| Mo1    | O3     | 1.7457(74) |
| Mo1    | O8     | 1.7504(73) |
| Mo1    | O7     | 1.7632(63) |
| Mo1    | O2     | 1.7829(63) |
| Mo2    | O4     | 1.7350(78) |
| Mo2    | O6     | 1.7351(68) |
| Mo2    | O5     | 1.7373(68) |
| Mo2    | O1     | 1.8661(9)  |
| Y1     | O8     | 2.2470(67) |
| Y1     | O7     | 2.2593(63) |
| Y1     | O3     | 2.2679(77) |
| Y1     | O5     | 2.3011(67) |
| Y1     | O2     | 2.3152(69) |
| Y1     | O4     | 2.3413(70) |
| Y1     | O6     | 2.3552(64) |
| O1     | Mo2    | 1.8661(9)  |
| O1     | Mo2    | 1.8661(9)  |
| O2     | Mo1    | 1.7829(63) |
| O2     | Y1     | 2.3152(69) |
| O3     | Mo1    | 1.7457(74) |
| O3     | Y1     | 2.2679(77) |
| O4     | Mo2    | 1.7350(78) |
| O4     | Y1     | 2.3413(70) |
| O5     | Mo2    | 1.7373(68) |

|    |     |            |
|----|-----|------------|
| O5 | Y1  | 2.3011(67) |
| O6 | Mo2 | 1.7351(68) |
| O6 | Y1  | 2.3552(64) |
| O7 | Mo1 | 1.7632(63) |
| O7 | Y1  | 2.2593(63) |
| O8 | Mo1 | 1.7504(73) |
| O8 | Y1  | 2.2470(67) |

**Table S4.** Atomic displacement parameters ( $\text{\AA}^2$ ) for  $\text{Y}_2\text{Mo}_4\text{O}_{15}$  (293K)

| Atom | $U^{11}$  | $U^{22}$  | $U^{33}$  | $U^{23}$  | $U^{13}$  | $U^{12}$  |
|------|-----------|-----------|-----------|-----------|-----------|-----------|
| Mo1  | 0.0125(5) | 0.0143(5) | 0.0097(5) | 0.0013(2) | 0.0007(3) | 0.0002(2) |
| Mo2  | 0.0104(5) | 0.0150(5) | 0.0117(5) | 0.0008(3) | 0.0032(3) | 0.0004(2) |
| Y1   | 0.0112(6) | 0.0135(5) | 0.0106(5) | 0.0002(3) | 0.0028(3) | 0.0005(3) |
| O1   | 0.019(6)  | 0.029(5)  | 0.022(5)  | -0.001(4) | -0.003(3) | 0.014(4)  |
| O2   | 0.019(4)  | 0.019(3)  | 0.021(3)  | -0.002(3) | 0.010(3)  | 0.006(2)  |
| O3   | 0.023(4)  | 0.023(3)  | 0.020(3)  | 0.001(3)  | 0.004(2)  | -0.006(2) |
| O4   | 0.010(3)  | 0.031(4)  | 0.017(3)  | -0.001(3) | 0.010(3)  | -0.010(3) |
| O5   | 0.015(4)  | 0.021(3)  | 0.024(3)  | 0.005(2)  | 0.006(3)  | 0.004(2)  |
| O6   | 0.008(3)  | 0.032(4)  | 0.022(3)  | 0.000(3)  | 0.002(3)  | -0.006(3) |
| O7   | 0.023(4)  | 0.026(4)  | 0.016(3)  | -0.002(3) | 0.002(5)  | -0.008(3) |
| O8   | 0.018(4)  | 0.028(3)  | 0.019(3)  | 0.011(3)  | 0.000(3)  | 0.011(3)  |

**Table S5.** Crystal Data and Structure Refinement for  $\text{Y}_2\text{Mo}_4\text{O}_{15}$  (323 K)

| Empirical formula | $\text{LiY}(\text{MoO}_4)_2$                                                                                                         |
|-------------------|--------------------------------------------------------------------------------------------------------------------------------------|
| Formula weight    | 801.58 g/mol                                                                                                                         |
| Temperature       | 322.99 (1) K                                                                                                                         |
| Wavelength        | 0.71073                                                                                                                              |
| Crystal system    | Monoclinic                                                                                                                           |
| Space group       | $P2_1/c$                                                                                                                             |
| Sum formula       | $\text{Y}_2\text{Mo}_4\text{O}_{15}$                                                                                                 |
| Cell              | $a = 6.8176 (5) \text{\AA}$<br>$b = 9.5857 (6) \text{\AA}$<br>$c = 10.5127 (8) \text{\AA}$<br>$\alpha = 90$<br>$\beta = 105.512 (8)$ |

|               |                             |                                    |      |
|---------------|-----------------------------|------------------------------------|------|
|               |                             | gamma = 90                         |      |
|               | Volume                      | 662.00 (9) Å <sup>3</sup>          |      |
|               | Z                           | 2                                  |      |
|               | Density (calculated)        | 4.0211 g/cm <sup>3</sup>           |      |
| μ coefficient | 15.413                      |                                    | 15.0 |
|               | Nref                        | 1353                               |      |
|               | Tmin, Tmax                  | 0.557, 0.780                       |      |
|               | F(000)                      | 732.0                              |      |
|               | Crystal size                | 0.12 × 0.09 × 0.07 mm <sup>3</sup> |      |
|               | Theat (max)                 | 26.372                             |      |
|               |                             | -9 ≤ h ≤ 9                         |      |
|               | Index ranges                | -12 ≤ k ≤ 13                       |      |
|               |                             | -13 ≤ l ≤ 14                       |      |
|               | R (reflections)             | 0.0498 (1210)                      |      |
|               | wR2 (reflections)           | 0.1217 (1349)                      |      |
|               | Data completeness           | 0.997                              |      |
|               | Largest diff. peak and hole | 1.90 and -2.16 e Å <sup>-3</sup>   |      |

**Table S6.** Selected bond angles (deg.) in Y<sub>2</sub>Mo<sub>4</sub>O<sub>15</sub> (323K)

| Atom1 | Atom2 | Atom3 | Angle 2, 1, 3 |
|-------|-------|-------|---------------|
| Mo1   | O7    | O6    | 109.846(303)  |
| Mo1   | O7    | O4    | 109.095(294)  |
| Mo1   | O7    | O2    | 110.783(285)  |
| Mo1   | O6    | O4    | 107.409(308)  |
| Mo1   | O6    | O2    | 109.966(281)  |
| Mo1   | O4    | O2    | 109.673(298)  |
| Mo2   | O3    | O1    | 104.254(298)  |
| Mo2   | O3    | O5    | 105.301(330)  |
| Mo2   | O3    | O8    | 103.203(229)  |
| Mo2   | O1    | O5    | 113.757(292)  |
| Mo2   | O1    | O8    | 115.541(213)  |
| Mo2   | O5    | O8    | 113.150(235)  |
| Y1    | O6    | O7    | 82.239(226)   |
| Y1    | O6    | O4    | 162.637(226)  |
| Y1    | O6    | O1    | 118.376(216)  |
| Y1    | O6    | O2    | 90.418(215)   |

|    |     |     |              |
|----|-----|-----|--------------|
| Y1 | O6  | O5  | 87.286(235)  |
| Y1 | O6  | O3  | 83.173(229)  |
| Y1 | O7  | O4  | 96.066(227)  |
| Y1 | O7  | O1  | 76.130(221)  |
| Y1 | O7  | O2  | 150.447(223) |
| Y1 | O7  | O5  | 139.210(243) |
| Y1 | O7  | O3  | 74.937(244)  |
| Y1 | O4  | O1  | 77.559(232)  |
| Y1 | O4  | O2  | 82.566(220)  |
| Y1 | O4  | O5  | 104.617(229) |
| Y1 | O4  | O3  | 79.718(235)  |
| Y1 | O1  | O2  | 131.435(216) |
| Y1 | O1  | O5  | 74.614(236)  |
| Y1 | O1  | O3  | 140.741(229) |
| Y1 | O2  | O5  | 68.286(232)  |
| Y1 | O2  | O3  | 75.784(224)  |
| Y1 | O5  | O3  | 142.693(247) |
| O1 | Mo2 | Y1  | 143.527(323) |
| O2 | Mo1 | Y1  | 136.206(315) |
| O3 | Mo2 | Y1  | 163.454(397) |
| O4 | Mo1 | Y1  | 147.870(357) |
| O5 | Mo2 | Y1  | 119.719(345) |
| O6 | Mo1 | Y1  | 145.634(341) |
| O7 | Mo1 | Y1  | 164.695(365) |
| O8 | Mo2 | Mo2 | 180.000      |

**Table S7.** Selected bond lengths (Å) in LiY(MoO<sub>4</sub>)<sub>2</sub> (323K)

| Atom 1 | Atom 1 | d 1,2 (Å)  |
|--------|--------|------------|
| Mo1    | O7     | 1.7441(68) |
| Mo1    | O6     | 1.7482(71) |
| Mo1    | O4     | 1.7518(60) |
| Mo1    | O2     | 1.7865(57) |
| Mo2    | O3     | 1.7315(68) |
| Mo2    | O1     | 1.7387(58) |
| Mo2    | O5     | 1.7406(77) |
| Mo2    | O8     | 1.8667(9)  |

|    |     |            |
|----|-----|------------|
| Y1 | O6  | 2.2423(62) |
| Y1 | O7  | 2.2694(72) |
| Y1 | O4  | 2.2694(63) |
| Y1 | O1  | 2.3022(59) |
| Y1 | O2  | 2.3047(64) |
| Y1 | O5  | 2.3411(69) |
| Y1 | O3  | 2.3586(63) |
| O1 | Mo2 | 1.7387(58) |
| O1 | Y1  | 2.3022(59) |
| O2 | Mo1 | 1.7865(57) |
| O2 | Y1  | 2.3047(64) |
| O3 | Mo2 | 1.7375(68) |
| O3 | Y1  | 2.3586(63) |
| O4 | Mo1 | 1.7518(60) |
| O4 | Y1  | 2.2694(63) |
| O5 | Mo2 | 1.7406(77) |
| O5 | Y1  | 2.3411(69) |
| O6 | Mo1 | 1.7482(71) |
| O6 | Y1  | 2.2423(62) |
| O7 | Mo1 | 1.7441(68) |
| O7 | Y1  | 2.2694(72) |
| O8 | Mo2 | 1.8667(9)  |
| O8 | Mo2 | 1.8667(9)  |

**Table S8.** Atomic displacement parameters ( $\text{\AA}^2$ ) for  $\text{Y}_2\text{Mo}_4\text{O}_{15}$  (323K)

| Atom | $U^{11}$  | $U^{22}$  | $U^{33}$  | $U^{23}$   | $U^{13}$  | $U^{12}$   |
|------|-----------|-----------|-----------|------------|-----------|------------|
| Mo1  | 0.0105(5) | 0.0133(5) | 0.0096(5) | -0.0015(2) | 0.0021(4) | -0.0003(2) |
| Mo2  | 0.0079(5) | 0.0134(5) | 0.0126(5) | 0.0005(2)  | 0.0005(3) | 0.0002(2)  |
| Y1   | 0.0087(5) | 0.0126(5) | 0.0110(5) | -0.0003(3) | 0.0021(4) | -0.0004(3) |
| O1   | 0.010(3)  | 0.015(3)  | 0.023(3)  | 0.005(2)   | -0.003(3) | 0.000(2)   |
| O2   | 0.017(3)  | 0.023(3)  | 0.019(3)  | 0.001(3)   | 0.006(3)  | -0.006(2)  |
| O3   | 0.009(3)  | 0.027(2)  | 0.023(3)  | -0.001(2)  | 0.007(2)  | -0.002(2)  |
| O4   | 0.016(4)  | 0.028(3)  | 0.017(3)  | 0.001(3)   | -0.001(3) | 0.006(3)   |
| O5   | 0.005(3)  | 0.031(3)  | 0.021(4)  | -0.001(2)  | 0.001(3)  | -0.010(3)  |

|    |          |          |          |           |          |           |
|----|----------|----------|----------|-----------|----------|-----------|
| O6 | 0.021(4) | 0.023(3) | 0.019(3) | -0.002(3) | 0.009(3) | -0.011(3) |
| O7 | 0.021(4) | 0.021(3) | 0.021(4) | 0.000(2)  | 0.010(3) | 0.005(2)  |
| O8 | 0.020(6) | 0.027(5) | 0.029(6) | -0.002(4) | 0.004(5) | 0.012(4)  |

**Table S9.** Crystal Data and Structure Refinement for  $\text{Y}_2\text{Mo}_4\text{O}_{15}$  (348K)

| Empirical formula           | $\text{LiY}(\text{MoO}_4)_2$         |      |
|-----------------------------|--------------------------------------|------|
| Formula weight              | 801.58 g/mol                         |      |
| Temperature                 | 348.00 (1) K                         |      |
| Wavelength                  | 0.71073                              |      |
| Crystal system              | Monoclinic                           |      |
| Space group                 | $P2_1/c$                             |      |
| Sum formula                 | $\text{Y}_2\text{Mo}_4\text{O}_{15}$ |      |
| Cell                        | $a = 6.8195$ (5) Å                   |      |
|                             | $b = 9.5837$ (6) Å                   |      |
|                             | $c = 10.5199$ (8) Å                  |      |
|                             | alpha = 90                           |      |
|                             | beta = 105.504 (8)                   |      |
| Volume                      | gamma = 90                           |      |
|                             | 662.52 (9) Å <sup>3</sup>            |      |
| Z                           | 2                                    |      |
| Density (calculated)        | 4.01791 g/cm <sup>3</sup>            |      |
| μ coefficient               | 15.403                               | 15.0 |
| Nref                        | 1353                                 |      |
| Tmin, Tmax                  | 0.557, 0.780                         |      |
| F(000)                      | 732.0                                |      |
| Crystal size                | 0.12 × 0.09 × 0.07 mm <sup>3</sup>   |      |
| Theat (max)                 | 26.372                               |      |
| Index ranges                | -8 ≤ h ≤ 8                           |      |
|                             | -11 ≤ k ≤ 11                         |      |
|                             | -13 ≤ l ≤ 13                         |      |
| R (reflections)             | 0.0497 (1217)                        |      |
| wR2 (reflections)           | 0.1152 (1343)                        |      |
| Data completeness           | 0.991                                |      |
| Largest diff. peak and hole | 1.67 and -1.81 e Å <sup>-3</sup>     |      |



**Table S10.** Selected bond angles (deg.) in Y<sub>2</sub>Mo<sub>4</sub>O<sub>15</sub> (348K)

| Atom1 | Atom2 | Atom3 | Angle 2, 1, 3 |
|-------|-------|-------|---------------|
| Mo1   | O6    | O5    | 113.596(279)  |
| Mo1   | O6    | O1    | 113.459(202)  |
| Mo1   | O6    | O7    | 104.389(314)  |
| Mo1   | O5    | O1    | 103.357(208)  |
| Mo1   | O5    | O7    | 115.530(198)  |
| Mo1   | O1    | O7    | 109.976(305)  |
| Mo2   | O2    | O4    | 108.663(290)  |
| Mo2   | O2    | O8    | 110.463(295)  |
| Mo2   | O2    | O3    | 108.663(290)  |
| Mo2   | O4    | O8    | 110.463 (295) |
| Mo2   | O4    | O3    | 108.108(299)  |
| Mo2   | O8    | O3    | 109.378(276)  |
| Y1    | O4    | O8    | 163.098(215). |
| Y1    | O4    | O2    | 82.193(231)   |
| Y1    | O4    | O31   | 118.133(211)  |
| Y1    | O4    | O3    | 90.145(213)   |
| Y1    | O4    | O6    | 87.079(228)   |
| Y1    | O4    | O5    | 83.532(232)   |
| Y1    | O8    | O2    | 96.365(228)   |
| Y1    | O8    | O1    | 77.47(221)    |
| Y1    | O8    | O3    | 82.799(214)   |
| Y1    | O8    | O6    | 104.354(227)  |
| Y1    | O8    | O5    | 79.835(228)   |
| Y1    | O2    | O1    | 76.146(228)   |
| Y1    | O2    | O3    | 150.375(225)  |
| Y1    | O2    | O6    | 139.061(242)  |
| Y1    | O2    | O15   | 75.026(234)   |
| Y1    | O1    | O3    | 131.660(208)  |
| Y1    | O1    | O6    | 74.530(232)   |
| Y1    | O1    | O5    | 140.733(226)  |
| Y1    | O3    | O6    | 68.351(217)   |
| Y1    | O3    | O5    | 75.697(219)   |
| Y1    | O6    | O5    | 143.755(232)  |

|    |     |     |              |
|----|-----|-----|--------------|
| O1 | Mo1 | Y1  | 143.474(320) |
| O2 | Mo2 | Y1  | 164.753(383) |
| O3 | Mo2 | Y1  | 136.372(314) |
| O4 | Mo2 | Y1  | 144.852(339) |
| O5 | Mo1 | Y1  | 163.566(362) |
| O6 | Mo1 | Y1  | 119.307(333) |
| O7 | Mo1 | Mo1 | 180.000(27)  |
| O8 | Mo2 | Y1  | 147.326(337) |

**Table S11.** Selected bond lengths (Å) in LiY(MoO<sub>4</sub>)<sub>2</sub> (348K)

| Atom 1 | Atom 1 | d 1,2 (Å)  |
|--------|--------|------------|
| Mo1    | O6     | 1.7380(69) |
| Mo1    | O5     | 1.7385(62) |
| Mo1    | O1     | 1.7393(58) |
| Mo1    | O7     | 1.8655(6)  |
| Mo2    | O2     | 1.7384(71) |
| Mo2    | O4     | 1.7448(71) |
| Mo2    | O8     | 1.7560(57) |
| Mo2    | O3     | 1.7837(56) |
| Y1     | O4     | 2.2540(61) |
| Y1     | O8     | 2.2729(59) |
| Y1     | O2     | 2.3753(73) |
| Y1     | O1     | 2.3023(58) |
| Y1     | O3     | 2.3047(63) |
| Y1     | O6     | 2.3525(69) |
| Y1     | O5     | 2.3532(58) |
| O1     | Mo1    | 1.7393(58) |
| O1     | Y1     | 2.3023(58) |
| O2     | Mo2    | 1.7384(71) |
| O2     | Y1     | 2.2753(73) |
| O3     | Mo2    | 1.7837(56) |
| O3     | Y1     | 2.3094(63) |
| O4     | Mo2    | 1.7448(71) |
| O4     | Y1     | 2.2540(61) |
| O5     | Mo1    | 1.7358(62) |
| O5     | Y1     | 2.3532(58) |

|    |     |            |
|----|-----|------------|
| O6 | Mo1 | 1.7380(69) |
| O6 | Y1  | 2.3525(69) |
| O7 | Mo1 | 1.8655(6)  |
| O7 | Mo1 | 1.8655(6)  |
| O8 | Mo2 | 1.7560(57) |
| O8 | Y1  | 2.2729(59) |

**Table S12.** Atomic displacement parameters ( $\text{\AA}^2$ ) for  $\text{Y}_2\text{Mo}_4\text{O}_{15}$  (348K)

| Atom | $U^{11}$  | $U^{22}$  | $U^{33}$  | $U^{23}$   | $U^{13}$  | $U^{12}$   |
|------|-----------|-----------|-----------|------------|-----------|------------|
| Mo1  | 0.0105(5) | 0.0149(5) | 0.0150(5) | -0.0007(2) | 0.0007(3) | -0.0004(2) |
| Mo2  | 0.0137(5) | 0.0140(5) | 0.0122(5) | 0.0017(2)  | 0.0032(3) | 0.0004(2)  |
| Y1   | 0.0116(5) | 0.0134(5) | 0.0130(5) | -0.0002(3) | 0.0028(3) | -0.0003(3) |
| O1   | 0.015(3)  | 0.017(3)  | 0.029(3)  | -0.004(2)  | -0.003(3) | -0.001(2)  |
| O2   | 0.019(3)  | 0.024(3)  | 0.031(3)  | 0.000(3)   | 0.010(3)  | -0.007(2)  |
| O3   | 0.015(3)  | 0.022(3)  | 0.019(3)  | -0.003(2)  | 0.004(2)  | 0.008(2)   |
| O4   | 0.018(3)  | 0.024(3)  | 0.026(3)  | 0.005(2)   | 0.010(3)  | 0.011(2)   |
| O5   | 0.005(3)  | 0.035(3)  | 0.029(3)  | 0.003(3)   | 0.006(3)  | 0.005(3)   |
| O6   | 0.017(4)  | 0.028(3)  | 0.024(3)  | 0.004(3)   | 0.002(3)  | 0.008(3)   |
| O7   | 0.029(6)  | 0.035(5)  | 0.029(5)  | -0.007(4)  | 0.002(5)  | -0.024(4)  |
| O8   | 0.020(3)  | 0.030(3)  | 0.023(3)  | 0.003(3)   | 0.000(3)  | -0.004(3)  |

**Table S13.** Crystal Data and Structure Refinement for  $\text{Y}_2\text{Mo}_4\text{O}_{15}$  (373K)

| Empirical formula | $\text{LiY}(\text{MoO}_4)_2$         |
|-------------------|--------------------------------------|
| Formula weight    | 801.58 g/mol                         |
| Temperature       | 373.00 (1) K                         |
| Wavelength        | 0.71073                              |
| Crystal system    | Monoclinic                           |
| Space group       | $P2_1/C$                             |
| Sum formula       | $\text{Y}_2\text{Mo}_4\text{O}_{15}$ |
|                   | a = 6.8217 (5) $\text{\AA}$          |
|                   | b = 9.5822 (6) $\text{\AA}$          |
|                   | c = 10.5206 (8) $\text{\AA}$         |
| Cell              | alpha = 90                           |
|                   | beta = 105.445 (8)                   |
|                   | gamma = 90                           |
| Volume            | 663.28 (8) $\text{\AA}^3$            |

|                             |                                    |
|-----------------------------|------------------------------------|
| Z                           | 2                                  |
| Density (calculated)        | 4.01332 g/cm <sup>3</sup>          |
| extinction coefficient      | 15.889                             |
| Nref                        | 1355                               |
| Tmin, Tmax                  | 0.557, 0.781                       |
| F(000)                      | 732.0                              |
| Crystal size                | 0.12 × 0.09 × 0.07 mm <sup>3</sup> |
| Theat (max)                 | 26.367                             |
|                             | -8 ≤ h ≤ 8                         |
| Index ranges                | -12 ≤ k ≤ 10                       |
|                             | -13 ≤ l ≤ 14                       |
| R (reflections)             | 0.0431 (1207)                      |
| wR2 (reflections)           | 0.1066 (1349)                      |
| Data completeness           | 0.996                              |
| Largest diff. peak and hole | 1.20 and -2.40 e Å <sup>-3</sup>   |

**Table S14.** Selected bond angles (deg.) in Y<sub>2</sub>Mo<sub>4</sub>O<sub>15</sub> (373K)

| Atom1 | Atom2 | Atom3 | Angle 2, 1, 3 |
|-------|-------|-------|---------------|
| Mo1   | O5    | O3    | 104.175(282)  |
| Mo1   | O5    | O8    | 104.885(294)  |
| Mo1   | O5    | O6    | 103.696(203)  |
| Mo1   | O3    | O8    | 113.463(276)  |
| Mo1   | O3    | O6    | 115.646(197)  |
| Mo1   | O8    | O6    | 113.340(202)  |
| Mo2   | O4    | O7    | 109.822(297)  |
| Mo2   | O4    | O2    | 109.488(281)  |
| Mo2   | O4    | O1    | 110.246(280)  |
| Mo2   | O7    | O2    | 107.927(292)  |
| Mo2   | O7    | O1    | 109.070(275)  |
| Mo2   | O2    | O1    | 110.251(287)  |
| Y1    | O7    | O2    | 163.344(215)  |
| Y1    | O7    | O4    | 82.476(219)   |
| Y1    | O7    | O13   | 117.89(216)   |
| Y1    | O7    | O1    | 90.363(212)   |
| Y1    | O7    | O8    | 86.700(217)   |
| Y1    | O7    | O5    | 83.706(215)   |

|    |     |     |              |
|----|-----|-----|--------------|
| Y1 | O2  | O4  | 95.771(223)  |
| Y1 | O2  | O3  | 77.389(211)  |
| Y1 | O2  | O1  | 82.977(214)  |
| Y1 | O2  | O8  | 104.789(227) |
| Y1 | O2  | O5  | 79.871(224)  |
| Y1 | O4  | O3  | 76.330(213)  |
| Y1 | O4  | O1  | 150.272(219) |
| Y1 | O4  | O8  | 139.276(232) |
| Y1 | O4  | O5  | 74.722(232)  |
| Y1 | O3  | O1  | 131.452(208) |
| Y1 | O3  | O8  | 74.483(217)  |
| Y1 | O3  | O5  | 140.832(214) |
| Y1 | O1  | O8  | 68.349(215)  |
| Y1 | O1  | O5  | 75.833(221)  |
| Y1 | O8  | O5  | 142.789(221) |
| O1 | Mo2 | Y1  | 136.171(313) |
| O2 | Mo2 | Y1  | 148.111(339) |
| O3 | Mo1 | Y1  | 143.619(319) |
| O4 | Mo2 | Y1  | 164.521(364) |
| O5 | Mo1 | Y1  | 163.830(358) |
| O6 | Mo1 | Mo1 | 180.000      |
| O7 | Mo2 | Y1  | 144.366(332) |
| O8 | Mo1 | Y1  | 119.425(311) |

**Table S15.** Selected bond lengths (Å) in LiY(MoO<sub>4</sub>)<sub>2</sub> (373K)

| Atom 1 | Atom 1 | d 1,2 (Å)  |
|--------|--------|------------|
| Mo1    | O5     | 1.7334(61) |
| Mo1    | O3     | 1.7433(58) |
| Mo1    | O8     | 1.7437(68) |
| Mo1    | O6     | 1.8668(8)  |
| Mo2    | O4     | 1.7437(68) |
| Mo2    | O7     | 1.7421(68) |
| Mo2    | O2     | 1.7531(57) |
| Mo2    | O1     | 1.7877(55) |
| Y1     | O7     | 2.2531(62) |
| Y1     | O2     | 2.2680(59) |

|    |     |            |
|----|-----|------------|
| Y1 | O4  | 2.2697(72) |
| Y1 | O3  | 2.2993(57) |
| Y1 | O1  | 2.3095(63) |
| Y1 | O8  | 2.3479(69) |
| Y1 | O5  | 2.3564(57) |
| O1 | Mo2 | 1.7877(55) |
| O1 | Y1  | 2.3095(63) |
| O2 | Mo2 | 1.7531(57) |
| O2 | Y1  | 2.2680(59) |
| O3 | Mo1 | 1.7433(58) |
| O3 | Y1  | 2.2993(57) |
| O4 | Mo2 | 1.7437(68) |
| O4 | Y1  | 2.2697(72) |
| O5 | Mo1 | 1.7334(61) |
| O5 | Y1  | 2.3564(57) |
| O6 | Mo1 | 1.8668(8)  |
| O6 | Mo1 | 1.8668(8)  |
| O7 | Mo2 | 1.7421(68) |
| O7 | Y1  | 2.2531(61) |
| O8 | Mo1 | 1.7437(68) |
| O8 | Y1  | 2.3479(63) |

**Table S16.** Atomic displacement parameters ( $\text{\AA}^2$ ) for  $\text{Y}_2\text{Mo}_4\text{O}_{15}$  (373K)

| Atom | $U^{11}$  | $U^{22}$  | $U^{33}$  | $U^{23}$  | $U^{13}$  | $U^{12}$  |
|------|-----------|-----------|-----------|-----------|-----------|-----------|
| Mo1  | 0.0105(4) | 0.0142(4) | 0.0146(4) | 0.0008(2) | 0.0003(3) | 0.0003(2) |
| Mo2  | 0.0133(5) | 0.0137(4) | 0.0114(4) | 0.0015(2) | 0.0022(3) | 0.0002(2) |
| Y1   | 0.0106(5) | 0.0127(4) | 0.0130(5) | 0.0005(2) | 0.0021(3) | 0.0007(2) |
| O1   | 0.014(3)  | 0.023(3)  | 0.021(3)  | -0.001(2) | 0.005(2)  | 0.007(2)  |
| O2   | 0.030(4)  | 0.027(3)  | 0.021(3)  | 0.000(3)  | 0.003(3)  | -0.003(2) |
| O3   | 0.018(3)  | 0.015(3)  | 0.032(3)  | 0.002(2)  | -0.002(3) | -0.001(2) |
| O4   | 0.029(3)  | 0.021(3)  | 0.032(4)  | 0.000(2)  | 0.019(3)  | 0.007(2)  |
| O5   | 0.016(3)  | 0.030(3)  | 0.028(3)  | -0.002(2) | 0.008(3)  | -0.007(2) |
| O6   | 0.017(5)  | 0.034(5)  | 0.029(5)  | 0.009(4)  | 0.004(4)  | 0.019(4)  |
| O7   | 0.024(3)  | 0.025(3)  | 0.027(3)  | 0.001(2)  | 0.010(3)  | 0.012(2)  |
| O8   | 0.015(3)  | 0.033(3)  | 0.022(3)  | 0.001(2)  | 0.002(3)  | 0.009(3)  |
